# Supplementary material for: Genetic characteristic of coexisting of mcr-1 and blaNDM-5 in Escherichia coli isolates from lesion-bearing animal organs
Source: Front Microbiol. 2023 Mar 15;14:1116413. doi: 10.3389/fmicb.2023.1116413 (PMC10050402; doi:10.3389/fmicb.2023.1116413)
Supplement: Supplementary file 1 [file Table_1.xlsx]

## Sheet: Sheet1
Strain	Organism	ST	adk	fumC	gyrB	icd	mdh	purA	recA	CC	Source	Host	collection_date	Country	Publish_Year	Reference
MCR1_NJ	E. coli	ST405	35	37	29	25	4	5	73	ST405 Cplx	urine	Homo sapiens	2014	the United States	2016	Colistin- and Carbapenem-Resistant Escherichia coli Harboring mcr-1 and blaNDM-5, Causing a Complicated Urinary Tract Infection in a Patient from the United States
CQ02-121	E. coli	ST156	6	29	32	16	11	8	44	ST156 Cplx	rectal swab	pet cat	2015	China	2016	Co-transfer of blaNDM-5 and mcr-1 by an IncX3–X4 hybrid plasmid in Escherichia coli
NDM131	E. coli	ST156	6	29	32	16	11	8	44	ST156 Cplx	rectal swab	Cairina moschata	2015	China	2016	Emergence of NDM-5- and MCR-1-Producing Escherichia coli Clones ST648 and ST156 from a Single Muscovy Duck (Cairina moschata)
NDM132	E. coli	ST648	92	4	87	96	70	58	2	ST648 Cplx	rectal swab	Cairina moschata	2015	China	2016	Emergence of NDM-5- and MCR-1-Producing Escherichia coli Clones ST648 and ST156 from a Single Muscovy Duck (Cairina moschata)
CDA6	E. coli	ST167	10	11	4	8	8	13	2	101	urine	Homo sapiens	2015	China	2016	Detection of the mcr-1 Colistin Resistance Gene in Carbapenem-Resistant Enterobacteriaceae from Different Hospitals in China
BJ10	E. coli	ST156	6	29	32	16	11	8	44	ST156 Cplx	ascites	Homo sapiens	2015	China	2016	Detection of the mcr-1 Colistin Resistance Gene in Carbapenem-Resistant Enterobacteriaceae from Different Hospitals in China
XG-E1	E. coli	ST446	6	19	3	26	11	8	6	ST446 Cplx	fecal	dairy cows	2015	China	2017	Characterization of NDM-5-positive extensively resistant Escherichia coli isolates from dairy cows
ECMY2	E. coli	ST1114	10	27	5	10	12	1	2	44446	anal swabs	Swine	2015	China	2017	Various Sequence Types of Escherichia coli Isolates Coharboring blaNDM-5 and mcr-1 Genes from a Commercial Swine Farm in China
ECMY12	E. coli	ST167	10	11	4	8	8	13	2	ST10 Cplx	anal swabs	Swine	2015	China	2017	Various Sequence Types of Escherichia coli Isolates Coharboring blaNDM-5 and mcr-1 Genes from a Commercial Swine Farm in China
ECMY4a	E. coli	ST410	6	4	12	1	20	18	7	ST23 Cplx	anal swabs	Swine	2015	China	2017	Various Sequence Types of Escherichia coli Isolates Coharboring blaNDM-5 and mcr-1 Genes from a Commercial Swine Farm in China
ECMY4b	E. coli	ST90	6	4	12	1	20	8	7	ST23 Cplx	anal swabs	Swine	2015	China	2017	Various Sequence Types of Escherichia coli Isolates Coharboring blaNDM-5 and mcr-1 Genes from a Commercial Swine Farm in China
ECMY16	E. coli	ST4429	112	11	5	8	8	8	86	Singleton	anal swabs	Swine	2015	China	2017	Various Sequence Types of Escherichia coli Isolates Coharboring blaNDM-5 and mcr-1 Genes from a Commercial Swine Farm in China
ECMY5	E. coli	ST4656	6	11	4	8	8	18	2	Singleton	anal swabs	Swine	2015	China	2017	Various Sequence Types of Escherichia coli Isolates Coharboring blaNDM-5 and mcr-1 Genes from a Commercial Swine Farm in China
ECMY1	E. coli	ST156	6	29	32	16	11	8	44	ST156 Cplx	anal swabs	Swine	2015	China	2017	Various Sequence Types of Escherichia coli Isolates Coharboring blaNDM-5 and mcr-1 Genes from a Commercial Swine Farm in China
ECMY14	E. coli	ST54	6	30	5	1	24	8	21	Singleton	anal swabs	Swine	2015	China	2017	Various Sequence Types of Escherichia coli Isolates Coharboring blaNDM-5 and mcr-1 Genes from a Commercial Swine Farm in China
ECMY13	E. coli	ST4463	10	27	5	10	8	8	14	Singleton	anal swabs	Swine	2015	China	2017	Various Sequence Types of Escherichia coli Isolates Coharboring blaNDM-5 and mcr-1 Genes from a Commercial Swine Farm in China
ECMY17	E. coli	ST3331	6	11	4	1	8	8	2	Singleton	anal swabs	Swine	2015	China	2017	Various Sequence Types of Escherichia coli Isolates Coharboring blaNDM-5 and mcr-1 Genes from a Commercial Swine Farm in China
ECMY6	E. coli	ST165	10	27	5	10	12	8	2	ST165 Cplx	anal swabs	Swine	2015	China	2017	Various Sequence Types of Escherichia coli Isolates Coharboring blaNDM-5 and mcr-1 Genes from a Commercial Swine Farm in China
ECMY9	E. coli	ST1178	10	27	5	8	12	1	2	ST165 Cplx	anal swabs	Swine	2015	China	2017	Various Sequence Types of Escherichia coli Isolates Coharboring blaNDM-5 and mcr-1 Genes from a Commercial Swine Farm in China
ECMY18	E. coli	ST1437	10	27	5	8	8	1	2	Singleton	anal swabs	Swine	2015	China	2017	Various Sequence Types of Escherichia coli Isolates Coharboring blaNDM-5 and mcr-1 Genes from a Commercial Swine Farm in China
ECMY1	E. coli	ST2439	21	37	27	6	5	5	4	Singleton	anal swabs	Swine	2015	China	2017	Various Sequence Types of Escherichia coli Isolates Coharboring blaNDM-5 and mcr-1 Genes from a Commercial Swine Farm in China
ECMY12	E. coli	ST48	6	11	4	8	8	8	2	ST10 Cplx	anal swabs	Swine	2015	China	2017	Various Sequence Types of Escherichia coli Isolates Coharboring blaNDM-5 and mcr-1 Genes from a Commercial Swine Farm in China
WCHEC-LL123	E. coli	ST206	6	7	5	1	8	18	2	ST206 Cplx	abdominal abscess	Homo sapiens	2017	China	2017	New Variant of mcr-3 in an Extensively Drug-Resistant Escherichia coli Clinical Isolate Carrying mcr-1 and blaNDM-5
GZ1	E. coli	ST10	10	11	4	8	8	8	2	ST10 Cplx	abdominal drainage	Homo sapiens	2015	China	2017	Decreased Fitness and Virulence in ST10 Escherichia coli Harboring blaNDM-5 and mcr-1 against a ST4981 Strain with blaNDM-5
GZ2	E. coli	ST10	10	11	4	8	8	8	2	ST10 Cplx	urine	Homo sapiens	2015	China	2017	Decreased Fitness and Virulence in ST10 Escherichia coli Harboring blaNDM-5 and mcr-1 against a ST4981 Strain with blaNDM-5
GB788	E. coli	ST46	8	7	1	8	8	8	6	ST46 Cplx	fecal specimens	Homo sapiens	2016	China	2018	Co-production of MCR-1 and NDM-5 in Escherichia coli isolated from a colonization case of inpatient
P744T	E. coli	ST1602	136	11	4	1	8	18	2	ST10 Cplx	rectal swab	Swine	2015	China	2018	IncX3 Epidemic Plasmid Carrying blaNDM-5 in Escherichia coli from Swine in Multiple Geographic Areas in China
P768-11	E. coli	ST871	64	7	1	8	8	8	6	Singleton	rectal swab	Swine	2016	China	2018	IncX3 Epidemic Plasmid Carrying blaNDM-5 in Escherichia coli from Swine in Multiple Geographic Areas in China
P785	E. coli	ST7512	8	1032	1	8	8	8	2	Singleton	rectal swab	Swine	2016	China	2018	IncX3 Epidemic Plasmid Carrying blaNDM-5 in Escherichia coli from Swine in Multiple Geographic Areas in China
P788A-32	E. coli	ST7510	10	11	4	158	8	8	2	Singleton	rectal swab	Swine	2016	China	2018	IncX3 Epidemic Plasmid Carrying blaNDM-5 in Escherichia coli from Swine in Multiple Geographic Areas in China
E1462	E. coli	ST189	10	27	5	10	12	8	49	ST165 Cplx	Stool specimens	Human	2016	China	2018	Emerging Carriage ofNDM-5 and MCR-1 in Escherichia coli From Healthy People in Multiple Regions in China: A Cross Sectional Observational Study
E2525-1	E. coli	ST3759	6	29	14	16	24	13	2	Singleton	Stool specimens	Human	2016	China	2018	Emerging Carriage ofNDM-5 and MCR-1 in Escherichia coli From Healthy People in Multiple Regions in China: A Cross Sectional Observational Study
E159	E. coli	ST206	6	7	5	1	8	18	2	ST206 Cplx	stool sample	human	2016	China	2018	Discovery and characterisation of an escherichia coli ST206 strain producing NDM-5 and MCR-1 from a patient with acute diarrhoea in China
WCHEC025943	E. coli	ST410	6	4	12	1	20	18	7	ST23 Cplx	sewage	environment	2017	China	2019	The co-transfer of plasmid-borne colistin-resistant genes mcr-1 and mcr-3.5, the carbapenemase gene blaNDM-5 and the 16S methylase gene rmtB from Escherichia coli
EC129	E. coli	ST167	10	11	4	8	8	13	2	ST10 Cplx	sputum sample	human	2018	Japan	2019	Whole-genome analysis of EC129, an NDM-5-, CTX-M-14-, OXA-10- and MCR-1-co-producing Escherichia coli ST167 strain isolated from Japan
EC16-50	E. coli	ST167	10	11	4	8	8	13	2	ST10 Cplx	bile	bile	2016	China	2019	Characterization of a novel blaNDM-5-harboring IncFII plasmid and an mcr-1-bearing IncI2 plasmid in a single Escherichia coli ST167 clinical isolate
R15	E. coli	ST744	10	11	135	8	8	8	2	ST10 Cplx	wastewater	environment	2017	China	2020	Co-Existence of mcr-1 and blaNDM-5 in an Escherichia coli Strain Isolated from the Pharmaceutical Industry, WWTP
GZEC065	E. coli	ST156	6	29	32	16	11	8	44	ST156 Cplx	blood sample	human	2017	China	2020	Genomic features of an Escherichia coli ST156 strain harboring chromosomelocated mcr-1 and plasmid-mediated blaNDM-5
1106	E. coli	ST83	13	38	19	13	30	25	29	Singleton	chicken meat	chicken	missing	China	2021	Complete Genetic Analysis of Plasmids Carried by Two Nonclonal blaNDM-5- and mcr-1-Bearing Escherichia coli Strains: Insight into Plasmid Transmission among Foodborne Bacteria
1107	E. coli	ST21	16	4	12	16	9	7	7	ST29 Cplx	chicken meat	chicken	missing	China	2021	Complete Genetic Analysis of Plasmids Carried by Two Nonclonal blaNDM-5- and mcr-1-Bearing Escherichia coli Strains: Insight into Plasmid Transmission among Foodborne Bacteria
w189	E. coli	ST189	10	27	5	10	12	8	49	ST165 Cplx	fecal sample	chicken	2015-2019	China	2021	High Prevalence and Diversity Characteristics of blaNDM, mcr, and blaESBLs Harboring MultidrugResistant Escherichia coli From Chicken, Pig, and Cattle in China
w176	E. coli	ST189	10	27	5	10	12	8	49	ST165 Cplx	fecal sample	chicken	2015-2019	China	2021	High Prevalence and Diversity Characteristics of blaNDM, mcr, and blaESBLs Harboring MultidrugResistant Escherichia coli From Chicken, Pig, and Cattle in China
w202	E. coli	ST189	10	27	5	10	12	8	49	ST165 Cplx	fecal sample	chicken	2015-2019	China	2021	High Prevalence and Diversity Characteristics of blaNDM, mcr, and blaESBLs Harboring MultidrugResistant Escherichia coli From Chicken, Pig, and Cattle in China
w208	E. coli	ST189	10	27	5	10	12	8	49	ST165 Cplx	fecal sample	chicken	2015-2019	China	2021	High Prevalence and Diversity Characteristics of blaNDM, mcr, and blaESBLs Harboring MultidrugResistant Escherichia coli From Chicken, Pig, and Cattle in China
779	E. coli	ST101	43	41	15	18	11	7	6	ST101 Cplx	urine	human	2016	China	2022	Emergence of a Multidrug-Resistant Escherichia coli Co-Carrying a New mcr-1.33 Variant and blaNDM-5 Genes Recovered from a Urinary Tract Infection
CQ6-1	E. coli	ST101	43	41	15	18	11	7	6	ST101 Cplx	rectal swab	dog	2015	China	2022	NDM-5-Producing Escherichia coli Co-Harboring mcr-1 Gene in Companion Animals in China
PT62	E. coli	ST6775	288	11	109	399	7	1	2	Singleton	fecal sample	Pigeon	2021	China	2022	Coexistence of tet(X4), mcr-1, and blaNDM-5 coli Isolates of Animal Origin in China
J-1	E. coli	ST-156	6	29	32	16	11	8	44	ST156 Cplx	Intestine	chicken	2016	China	2021	Genetic Features of Plasmid- and Chromosome-Mediated mcr-1 in Escherichia coli Isolates From Animal Organs With Lesions
J-2	E. coli	ST-156	6	29	32	16	11	8	44	ST156 Cplx	Intestine	chicken	2016	China	2021	Genetic Features of Plasmid- and Chromosome-Mediated mcr-1 in Escherichia coli Isolates From Animal Organs With Lesions
J-3	E. coli	ST-156	6	29	32	16	11	8	44	ST156 Cplx	Intestine	chicken	2016	China	2021	Genetic Features of Plasmid- and Chromosome-Mediated mcr-1 in Escherichia coli Isolates From Animal Organs With Lesions
J-4	E. coli	ST-156	6	29	32	16	11	8	44	ST156 Cplx	Intestine	chicken	2016	China	2021	Genetic Features of Plasmid- and Chromosome-Mediated mcr-1 in Escherichia coli Isolates From Animal Organs With Lesions
J-5	E. coli	ST-156	6	29	32	16	11	8	44	ST156 Cplx	Intestine	chicken	2016	China	2021	Genetic Features of Plasmid- and Chromosome-Mediated mcr-1 in Escherichia coli Isolates From Animal Organs With Lesions
J-6	E. coli	ST-156	6	29	32	16	11	8	44	ST156 Cplx	Intestine	chicken	2016	China	2021	Genetic Features of Plasmid- and Chromosome-Mediated mcr-1 in Escherichia coli Isolates From Animal Organs With Lesions
J-7	E. coli	ST-156	6	29	32	16	11	8	44	ST156 Cplx	Intestine	chicken	2016	China	2021	Genetic Features of Plasmid- and Chromosome-Mediated mcr-1 in Escherichia coli Isolates From Animal Organs With Lesions
J-8	E. coli	ST-156	6	29	32	16	11	8	44	ST156 Cplx	liver	chicken	2017	China	2021	Genetic Features of Plasmid- and Chromosome-Mediated mcr-1 in Escherichia coli Isolates From Animal Organs With Lesions
N-14	E. coli	ST-156	6	29	32	16	11	8	44	ST156 Cplx	uterine rinsing fluid	dairy cow	2016	China	2021	Genetic Features of Plasmid- and Chromosome-Mediated mcr-1 in Escherichia coli Isolates From Animal Organs With Lesions
